# Supplementary material for: Functional Geometry of Human Connectomes
Source: PubMed Central journal article supplement (PMC6700117; doi:10.1038/s41598-019-48568-5), 2019-08-19
Supplement: 41598_2019_48568_MOESM1_ESM.pdf [file 41598_2019_48568_MOESM1_ESM.pdf]

**Supplementary Information for  
Functional Geometry of Human Connectomes**

Bosiljka Tadić<sup>a,b</sup>, Miroslav Andjelković<sup>c</sup>, Roderick Melnik<sup>d,e</sup>  
<sup>a</sup>Department of Theoretical Physics, Jožef Stefan Institute, Jamova 39,  
 Ljubljana, Slovenia; <sup>b</sup>Complexity Science Hub, Josefstädter Strasse 39,  
 Vienna, Austria; <sup>c</sup>Institute for Nuclear Sciences Vinča, University of Belgrade,  
 11000 Belgrade, Serbia; <sup>d</sup>MS2Discovery Interdisciplinary Research Institute,  
 M2NeT Laboratory and Department of Mathematics, Wilfrid Laurier University, Waterloo, ON, Canada,  
<sup>e</sup>BCAM - Basque Center for Applied Mathematics, Alameda de Mazarredo 14, E-48009 Bilbao, Spain

**Contents**

|                                                                                               |   |
|-----------------------------------------------------------------------------------------------|---|
| <b>1. Fig. SI-1: Weights of edges</b>                                                         | 1 |
| <b>2. Tables SI-I,II: Structure vectors for the F- and M-connectomes at 1000K fibres</b>      | 1 |
| <b>3. List L-I: Vertices forming six 14-cliques in human connectome at 1000K and Fig.SI-2</b> | 2 |
| <b>4. List L-II: The excess edges with large weights in the F-connectome</b>                  | 2 |
| <b>5. Fig. SI-3: The complete subgraph F-excess1195</b>                                       | 9 |

TABLE SI-I: Components of the first (FSV), second (SSV) and third (TSV) structure vectors against the topology levels  $q$  for the consensus Male and Female connectomes at 1000K fibres launched.

| q  | Male |      |       | Female |      |       |
|----|------|------|-------|--------|------|-------|
|    | FSV  | SSV  | TSV   | FSV    | SSV  | TSV   |
| 0  | 91   | 2000 | 0.954 | 45     | 2893 | 0.984 |
| 1  | 59   | 1910 | 0.969 | 33     | 2849 | 0.988 |
| 2  | 66   | 1852 | 0.964 | 33     | 2817 | 0.988 |
| 3  | 114  | 1789 | 0.936 | 62     | 2785 | 0.977 |
| 4  | 222  | 1678 | 0.867 | 91     | 2726 | 0.966 |
| 5  | 314  | 1464 | 0.785 | 118    | 2636 | 0.956 |
| 6  | 339  | 1173 | 0.710 | 199    | 2522 | 0.921 |
| 7  | 298  | 854  | 0.651 | 219    | 2329 | 0.905 |
| 8  | 277  | 587  | 0.528 | 356    | 2121 | 0.832 |
| 9  | 140  | 337  | 0.584 | 420    | 1782 | 0.764 |
| 10 | 110  | 213  | 0.483 | 353    | 1378 | 0.743 |
| 11 | 83   | 114  | 0.271 | 359    | 1048 | 0.657 |
| 12 | 35   | 39   | 0.102 | 336    | 712  | 0.528 |
| 13 | 6    | 6    | 0.0   | 183    | 410  | 0.553 |
| 14 | -    | -    | -     | 126    | 251  | 0.498 |
| 15 | -    | -    | -     | 70     | 134  | 0.477 |
| 16 | -    | -    | -     | 49     | 68   | 0.279 |
| 17 | -    | -    | -     | 19     | 25   | 0.240 |
| 18 | -    | -    | -     | 8      | 10   | 0.200 |
| 19 | -    | -    | -     | 4      | 4    | 0.0   |
| 20 | -    | -    | -     | 1      | 1    | 0.0   |

**1. FIG. SI-1: WEIGHTS OF EDGES**

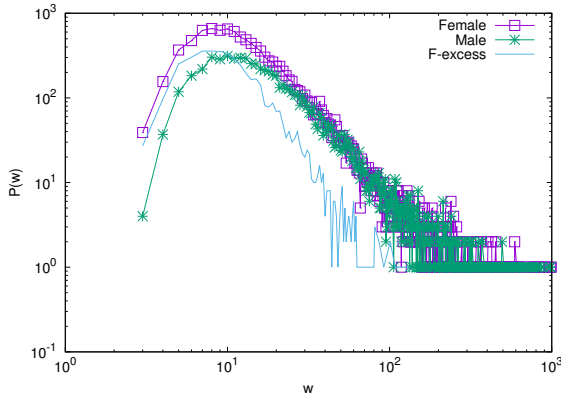

FIG. SI-1: Histogram of the weights of the edges in the F-connectome, the M-connectome and in the F-excess1195 subgraph.

**2. TABLES SI-I,II: STRUCTURE VECTORS FOR THE F- AND M-CONNECTOMES AT 1000K FIBRES**

Table-SI-I (structure vectors at 1000K) and Table-SI-II (some properties of SV at different  $N_F$ ).

TABLE SI-II: For different numbers of launched fibers  $N_F$ , some properties of the structure vectors:  $Q_{q=0}^\kappa$ —the number of graph fragments;  $q_{max}^\kappa$ —the order of the largest clique in the graph (the number of cliques of that order is given in the brackets);  $\hat{Q}_{q_{max}-1}^\kappa$ —the degree of connectivity at the level below the  $q_{max}$ , where  $\kappa \in M, F$  indicating the M- or F-connectome.

| $N_F$   | $Q_{q=0}^M$ | $Q_{q=0}^F$ | $q_{max}^M$ | $q_{max}^F$ | $\hat{Q}_{q_{max}-1}^M$ | $\hat{Q}_{q_{max}-1}^F$ |
|---------|-------------|-------------|-------------|-------------|-------------------------|-------------------------|
| 20000   | 604         | 446         | 5(6)        | 6(8)        | 0.154                   | 0.185                   |
| 200000  | 203         | 109         | 11(3)       | 14(2)       | 0.250                   | 0.125                   |
| 1000000 | 91          | 45          | 13(6)       | 20(1)       | 0.103                   | 0.00                    |

### 3. LIST L-I: VERTICES FORMING SIX 14-CLIQUE IN HUMAN CONNECTOME AT 1000K AND FIG.SI-2

Names of the brain regions belonging to six largest cliques in the human connectome common to F&M-connectome. The 16 vertices in the right hemisphere and, similarly, the 16 vertices in the left hemisphere share three cliques of the order 13. Their mutual connections as directed weighted edges are shown in Fig. SI-2.

52 "rh.rostralmiddlefrontal\_19"  
 53 "rh.rostralmiddlefrontal\_21"  
 56 "rh.rostralmiddlefrontal\_24"  
 57 "rh.rostralmiddlefrontal\_10"  
 58 "rh.rostralmiddlefrontal\_20"  
 60 "rh.rostralmiddlefrontal\_18"  
 63 "rh.rostralmiddlefrontal\_23"  
 94 "rh.superiorfrontal\_11"  
 128 "rh.caudalmiddlefrontal\_10"  
 129 "rh.caudalmiddlefrontal\_1"  
 131 "rh.caudalmiddlefrontal\_6"  
 503 "Right-Caudate"  
 504 "Right-Putamen"  
 70 "rh.rostralmiddlefrontal\_2"  
 495 "rh.insula\_1"  
 517 "lh.lateralorbitofrontal\_10"  
 523 "lh.lateralorbitofrontal\_1"  
 533 "lh.medialorbitofrontal\_4"  
 534 "lh.medialorbitofrontal\_5"

545 "lh.parstriangularis\_6"  
 546 "lh.parstriangularis\_2"  
 567 "lh.rostralmiddlefrontal\_26"  
 573 "lh.rostralmiddlefrontal\_23"  
 578 "lh.rostralmiddlefrontal\_7"  
 580 "lh.rostralmiddlefrontal\_3"  
 585 "lh.superiorfrontal\_32"  
 690 "lh.rostralanteriorcingulate\_3"  
 1009 "Left-Caudate"  
 1010 "Left-Putamen"  
 689 "lh.rostralanteriorcingulate\_4"  
 583 "lh.rostralmiddlefrontal\_1"

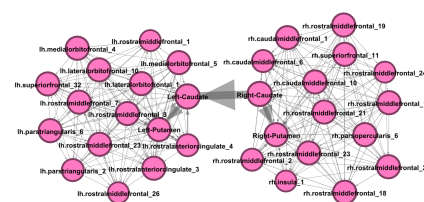

FIG. SI-2: Patterns of 239 directed weighted connections in the largest simplicial complex containing six 14-cliques in the common F&M-connectome at 1000K.

### 4. LIST L-II: THE EXCESS EDGES WITH LARGE WEIGHTS IN THE F-CONNECTOME

The listed edges have weights  $w > 18$ , i.e., in the tale of the weight distribution for F-excess, cf. Fig. SI-1).

203 "rh.isthmuscingulate\_5" 503 "Right-Caudate"  
 205 "rh.postcentral\_24" 237 "rh.supramarginal\_11"  
 205 "rh.postcentral\_24" 238 "rh.supramarginal\_13"  
 205 "rh.postcentral\_24" 254 "rh.supramarginal\_17"  
 210 "rh.postcentral\_11" 504 "Right-Putamen"  
 213 "rh.postcentral\_27" 237 "rh.supramarginal\_11"  
 213 "rh.postcentral\_27" 502 "Right-Thalamus-Proper"  
 216 "rh.postcentral\_9" 503 "Right-Caudate"  
 218 "rh.postcentral\_30" 255 "rh.superiorparietal\_13"  
 218 "rh.postcentral\_30" 488 "rh.insula\_6"  
 218 "rh.postcentral\_30" 502 "Right-Thalamus-Proper"  
 223 "rh.postcentral\_29" 502 "Right-Thalamus-Proper"  
 223 "rh.postcentral\_29" 505 "Right-Pallidum"  
 226 "rh.postcentral\_14" 502 "Right-Thalamus-Proper"  
 228 "rh.postcentral\_21" 502 "Right-Thalamus-Proper"  
 228 "rh.postcentral\_21" 503 "Right-Caudate"  
 229 "rh.postcentral\_8" 237 "rh.supramarginal\_11"  
 229 "rh.postcentral\_8" 254 "rh.supramarginal\_17"  
 229 "rh.postcentral\_8" 503 "Right-Caudate"  
 235 "rh.supramarginal\_19" 246 "rh.supramarginal\_14"  
 235 "rh.supramarginal\_19" 505 "Right-Pallidum"  
 238 "rh.supramarginal\_13" 502 "Right-Thalamus-Proper"

4 LIST L-II: THE EXCESS EDGES WITH LARGE WEIGHTS IN THE F-CONNECTOME

241 "rh.supramarginal\_8" 285 "rh.inferiorparietal\_21"  
244 "rh.supramarginal\_9" 502 "Right-Thalamus-Proper"  
244 "rh.supramarginal\_9" 503 "Right-Caudate"  
246 "rh.supramarginal\_14" 284 "rh.inferiorparietal\_13"  
249 "rh.supramarginal\_6" 257 "rh.superiorparietal\_18"  
249 "rh.supramarginal\_6" 269 "rh.superiorparietal\_22"  
249 "rh.supramarginal\_6" 285 "rh.inferiorparietal\_21"  
249 "rh.supramarginal\_6" 327 "rh.precuneus\_4"  
249 "rh.supramarginal\_6" 503 "Right-Caudate"  
250 "rh.supramarginal\_12" 284 "rh.inferiorparietal\_13"  
250 "rh.supramarginal\_12" 328 "rh.precuneus\_5"  
251 "rh.supramarginal\_1" 502 "Right-Thalamus-Proper"  
251 "rh.supramarginal\_1" 503 "Right-Caudate"  
251 "rh.supramarginal\_1" 504 "Right-Putamen"  
252 "rh.supramarginal\_7" 502 "Right-Thalamus-Proper"  
253 "rh.supramarginal\_5" 507 "Right-Hippocampus"  
254 "rh.supramarginal\_17" 257 "rh.superiorparietal\_18"  
254 "rh.supramarginal\_17" 276 "rh.superiorparietal\_11"  
254 "rh.supramarginal\_17" 326 "rh.precuneus\_20"  
255 "rh.superiorparietal\_13" 276 "rh.superiorparietal\_11"  
255 "rh.superiorparietal\_13" 315 "rh.precuneus\_10"  
255 "rh.superiorparietal\_13" 329 "rh.precuneus\_23"  
255 "rh.superiorparietal\_13" 505 "Right-Pallidum"  
256 "rh.superiorparietal\_24" 319 "rh.precuneus\_9"  
256 "rh.superiorparietal\_24" 455 "rh.bankssts\_1"  
256 "rh.superiorparietal\_24" 503 "Right-Caudate"  
261 "rh.superiorparietal\_12" 327 "rh.precuneus\_4"  
265 "rh.superiorparietal\_17" 329 "rh.precuneus\_23"  
266 "rh.superiorparietal\_7" 327 "rh.precuneus\_4"  
267 "rh.superiorparietal\_20" 325 "rh.precuneus\_8"  
269 "rh.superiorparietal\_22" 301 "rh.inferiorparietal\_18"  
269 "rh.superiorparietal\_22" 504 "Right-Putamen"  
270 "rh.superiorparietal\_9" 301 "rh.inferiorparietal\_18"  
270 "rh.superiorparietal\_9" 313 "rh.precuneus\_6"  
275 "rh.superiorparietal\_14" 301 "rh.inferiorparietal\_18"  
275 "rh.superiorparietal\_14" 329 "rh.precuneus\_23"  
275 "rh.superiorparietal\_14" 504 "Right-Putamen"  
276 "rh.superiorparietal\_11" 290 "rh.inferiorparietal\_12"  
276 "rh.superiorparietal\_11" 301 "rh.inferiorparietal\_18"  
276 "rh.superiorparietal\_11" 486 "rh.insula\_16"  
276 "rh.superiorparietal\_11" 504 "Right-Putamen"  
278 "rh.superiorparietal\_19" 311 "rh.precuneus\_1"  
279 "rh.superiorparietal\_6" 311 "rh.precuneus\_1"  
282 "rh.superiorparietal\_3" 385 "rh.lingual\_6"  
284 "rh.inferiorparietal\_13" 299 "rh.inferiorparietal\_14"  
284 "rh.inferiorparietal\_13" 303 "rh.inferiorparietal\_20"  
284 "rh.inferiorparietal\_13" 311 "rh.precuneus\_1"  
284 "rh.inferiorparietal\_13" 315 "rh.precuneus\_10"  
284 "rh.inferiorparietal\_13" 326 "rh.precuneus\_20"  
284 "rh.inferiorparietal\_13" 327 "rh.precuneus\_4"  
284 "rh.inferiorparietal\_13" 385 "rh.lingual\_6"  
284 "rh.inferiorparietal\_13" 455 "rh.bankssts\_1"  
284 "rh.inferiorparietal\_13" 485 "rh.transversetemporal\_3"  
284 "rh.inferiorparietal\_13" 490 "rh.insula\_5"  
284 "rh.inferiorparietal\_13" 504 "Right-Putamen"  
285 "rh.inferiorparietal\_21" 289 "rh.inferiorparietal\_25"

4 LIST L-II: THE EXCESS EDGES WITH LARGE WEIGHTS IN THE F-CONNECTOME

285 "rh.inferiorparietal\_21" 312 "rh.precuneus\_3"  
 285 "rh.inferiorparietal\_21" 313 "rh.precuneus\_6"  
 285 "rh.inferiorparietal\_21" 316 "rh.precuneus\_16"  
 285 "rh.inferiorparietal\_21" 486 "rh.insula\_16"  
 285 "rh.inferiorparietal\_21" 504 "Right-Putamen"  
 290 "rh.inferiorparietal\_12" 294 "rh.inferiorparietal\_2"  
 291 "rh.inferiorparietal\_8" 293 "rh.inferiorparietal\_26"  
 291 "rh.inferiorparietal\_8" 297 "rh.inferiorparietal\_1"  
 295 "rh.inferiorparietal\_17" 301 "rh.inferiorparietal\_18"  
 295 "rh.inferiorparietal\_17" 385 "rh.lingual\_6"  
 295 "rh.inferiorparietal\_17" 486 "rh.insula\_16"  
 295 "rh.inferiorparietal\_17" 490 "rh.insula\_5"  
 295 "rh.inferiorparietal\_17" 504 "Right-Putamen"  
 299 "rh.inferiorparietal\_14" 311 "rh.precuneus\_1"  
 299 "rh.inferiorparietal\_14" 504 "Right-Putamen"  
 300 "rh.inferiorparietal\_9" 308 "rh.inferiorparietal\_15"  
 301 "rh.inferiorparietal\_18" 326 "rh.precuneus\_20"  
 301 "rh.inferiorparietal\_18" 388 "rh.lingual\_5"  
 301 "rh.inferiorparietal\_18" 397 "rh.fusiform\_15"  
 301 "rh.inferiorparietal\_18" 407 "rh.parahippocampal\_2"  
 301 "rh.inferiorparietal\_18" 486 "rh.insula\_16"  
 302 "rh.inferiorparietal\_10" 467 "rh.superiortemporal\_21"  
 302 "rh.inferiorparietal\_10" 473 "rh.superiortemporal\_11"  
 303 "rh.inferiorparietal\_20" 341 "rh.pericalcarine\_1"  
 303 "rh.inferiorparietal\_20" 504 "Right-Putamen"  
 304 "rh.inferiorparietal\_22" 311 "rh.precuneus\_1"  
 308 "rh.inferiorparietal\_15" 390 "rh.fusiform\_2"  
 308 "rh.inferiorparietal\_15" 486 "rh.insula\_16"  
 309 "rh.inferiorparietal\_24" 313 "rh.precuneus\_6"  
 309 "rh.inferiorparietal\_24" 342 "rh.pericalcarine\_5"  
 313 "rh.precuneus\_6" 359 "rh.lateraloccipital\_3"  
 328 "rh.precuneus\_5" 504 "Right-Putamen"  
 342 "rh.pericalcarine\_5" 349 "rh.lateraloccipital\_18"  
 342 "rh.pericalcarine\_5" 356 "rh.lateraloccipital\_16"  
 345 "rh.pericalcarine\_2" 362 "rh.lateraloccipital\_21"  
 356 "rh.lateraloccipital\_16" 363 "rh.lateraloccipital\_10"  
 357 "rh.lateraloccipital\_23" 385 "rh.lingual\_6"  
 358 "rh.lateraloccipital\_7" 381 "rh.lingual\_3"  
 365 "rh.lateraloccipital\_4" 369 "rh.lateraloccipital\_5"  
 366 "rh.lateraloccipital\_19" 369 "rh.lateraloccipital\_5"  
 385 "rh.lingual\_6" 455 "rh.bankssts\_1"  
 388 "rh.lingual\_5" 433 "rh.middletemporal\_12"  
 388 "rh.lingual\_5" 455 "rh.bankssts\_1"  
 396 "rh.fusiform\_17" 455 "rh.bankssts\_1"  
 401 "rh.fusiform\_4" 432 "rh.inferiortemporal\_13"  
 401 "rh.fusiform\_4" 433 "rh.middletemporal\_12"  
 410 "rh.parahippocampal\_5" 502 "Right-Thalamus-Proper"  
 419 "rh.inferiortemporal\_5" 454 "rh.bankssts\_2"  
 425 "rh.inferiortemporal\_7" 432 "rh.inferiortemporal\_13"  
 425 "rh.inferiortemporal\_7" 434 "rh.middletemporal\_16"  
 433 "rh.middletemporal\_12" 440 "rh.middletemporal\_4"  
 433 "rh.middletemporal\_12" 467 "rh.superiortemporal\_21"  
 433 "rh.middletemporal\_12" 473 "rh.superiortemporal\_11"  
 445 "rh.middletemporal\_9" 454 "rh.bankssts\_2"  
 449 "rh.middletemporal\_19" 454 "rh.bankssts\_2"  
 450 "rh.middletemporal\_2" 454 "rh.bankssts\_2"

4 LIST L-II: THE EXCESS EDGES WITH LARGE WEIGHTS IN THE F-CONNECTOME

451 "rh.middletemporal\_18" 467 "rh.superiortemporal\_21"  
451 "rh.middletemporal\_18" 468 "rh.superiortemporal\_24"  
454 "rh.bankssts\_2" 490 "rh.insula\_5"  
455 "rh.bankssts\_1" 504 "Right-Putamen"  
467 "rh.superiortemporal\_21" 477 "rh.superiortemporal\_8"  
467 "rh.superiortemporal\_21" 480 "rh.superiortemporal\_20"  
477 "rh.superiortemporal\_8" 507 "Right-Hippocampus"  
497 "rh.insula\_14" 507 "Right-Hippocampus"  
498 "rh.insula\_3" 502 "Right-Thalamus-Proper"  
500 "rh.insula\_12" 507 "Right-Hippocampus"  
502 "Right-Thalamus-Proper" 706 "lh.posteriorcingulate\_1"  
503 "Right-Caudate" 697 "lh.caudalanteriorcingulate\_3"  
504 "Right-Putamen" 1009 "Left-Caudate"  
524 "lh.lateralorbitofrontal\_15" 1009 "Left-Caudate"  
545 "lh.parstriangularis\_6" 572 "lh.rostralmiddlefrontal\_21"  
545 "lh.parstriangularis\_6" 584 "lh.superiorfrontal\_11"  
545 "lh.parstriangularis\_6" 586 "lh.superiorfrontal\_8"  
548 "lh.parsopercularis\_6" 1013 "Left-Hippocampus"  
552 "lh.parsopercularis\_8" 560 "lh.rostralmiddlefrontal\_13"  
552 "lh.parsopercularis\_8" 693 "lh.caudalanteriorcingulate\_5"  
552 "lh.parsopercularis\_8" 1011 "Left-Pallidum"  
555 "lh.parsopercularis\_3" 1009 "Left-Caudate"  
558 "lh.rostralmiddlefrontal\_17" 629 "lh.caudalmiddlefrontal\_9"  
562 "lh.rostralmiddlefrontal\_19" 637 "lh.caudalmiddlefrontal\_4"  
566 "lh.rostralmiddlefrontal\_4" 571 "lh.rostralmiddlefrontal\_10"  
566 "lh.rostralmiddlefrontal\_4" 601 "lh.superiorfrontal\_21"  
566 "lh.rostralmiddlefrontal\_4" 637 "lh.caudalmiddlefrontal\_4"  
567 "lh.rostralmiddlefrontal\_26" 590 "lh.superiorfrontal\_35"  
591 "lh.superiorfrontal\_42" 595 "lh.superiorfrontal\_9"  
591 "lh.superiorfrontal\_42" 615 "lh.superiorfrontal\_18"  
596 "lh.superiorfrontal\_1" 613 "lh.superiorfrontal\_7"  
596 "lh.superiorfrontal\_1" 616 "lh.superiorfrontal\_34"  
597 "lh.superiorfrontal\_38" 686 "lh.paracentral\_5"  
598 "lh.superiorfrontal\_45" 615 "lh.superiorfrontal\_18"  
601 "lh.superiorfrontal\_21" 695 "lh.caudalanteriorcingulate\_1"  
602 "lh.superiorfrontal\_29" 694 "lh.caudalanteriorcingulate\_4"  
603 "lh.superiorfrontal\_44" 651 "lh.precentral\_21"  
603 "lh.superiorfrontal\_44" 687 "lh.paracentral\_11"  
603 "lh.superiorfrontal\_44" 696 "lh.caudalanteriorcingulate\_2"  
604 "lh.superiorfrontal\_19" 1009 "Left-Caudate"  
605 "lh.superiorfrontal\_30" 607 "lh.superiorfrontal\_22"  
607 "lh.superiorfrontal\_22" 611 "lh.superiorfrontal\_40"  
607 "lh.superiorfrontal\_22" 686 "lh.paracentral\_5"  
608 "lh.superiorfrontal\_27" 644 "lh.precentral\_12"  
609 "lh.superiorfrontal\_20" 686 "lh.paracentral\_5"  
612 "lh.superiorfrontal\_36" 695 "lh.caudalanteriorcingulate\_1"  
612 "lh.superiorfrontal\_36" 1009 "Left-Caudate"  
613 "lh.superiorfrontal\_7" 632 "lh.caudalmiddlefrontal\_13"  
613 "lh.superiorfrontal\_7" 697 "lh.caudalanteriorcingulate\_3"  
616 "lh.superiorfrontal\_34" 1009 "Left-Caudate"  
618 "lh.superiorfrontal\_3" 625 "lh.superiorfrontal\_6"  
618 "lh.superiorfrontal\_3" 685 "lh.paracentral\_6"  
622 "lh.superiorfrontal\_15" 1009 "Left-Caudate"  
623 "lh.superiorfrontal\_43" 683 "lh.paracentral\_3"  
623 "lh.superiorfrontal\_43" 687 "lh.paracentral\_11"  
624 "lh.superiorfrontal\_26" 662 "lh.precentral\_25"

4 LIST L-II: THE EXCESS EDGES WITH LARGE WEIGHTS IN THE F-CONNECTOME

624 "lh.superiorfrontal\_26" 686 "lh.paracentral\_5"  
628 "lh.superiorfrontal\_41" 683 "lh.paracentral\_3"  
629 "lh.caudalmiddlefrontal\_9" 651 "lh.precentral\_21"  
629 "lh.caudalmiddlefrontal\_9" 657 "lh.precentral\_4"  
629 "lh.caudalmiddlefrontal\_9" 661 "lh.precentral\_6"  
632 "lh.caudalmiddlefrontal\_13" 694 "lh.caudalanteriorcingulate\_4"  
632 "lh.caudalmiddlefrontal\_13" 698 "lh.posteriorcingulate\_5"  
632 "lh.caudalmiddlefrontal\_13" 699 "lh.posteriorcingulate\_4"  
632 "lh.caudalmiddlefrontal\_13" 1013 "Left-Hippocampus"  
633 "lh.caudalmiddlefrontal\_5" 731 "lh.postcentral\_31"  
633 "lh.caudalmiddlefrontal\_5" 769 "lh.superiorparietal\_27"  
633 "lh.caudalmiddlefrontal\_5" 770 "lh.superiorparietal\_25"  
636 "lh.caudalmiddlefrontal\_11" 641 "lh.caudalmiddlefrontal\_10"  
636 "lh.caudalmiddlefrontal\_11" 1009 "Left-Caudate"  
637 "lh.caudalmiddlefrontal\_4" 658 "lh.precentral\_13"  
637 "lh.caudalmiddlefrontal\_4" 662 "lh.precentral\_25"  
641 "lh.caudalmiddlefrontal\_10" 697 "lh.caudalanteriorcingulate\_3"  
645 "lh.precentral\_17" 686 "lh.paracentral\_5"  
647 "lh.precentral\_33" 661 "lh.precentral\_6"  
647 "lh.precentral\_33" 731 "lh.postcentral\_31"  
647 "lh.precentral\_33" 755 "lh.supramarginal\_17"  
647 "lh.precentral\_33" 757 "lh.supramarginal\_16"  
650 "lh.precentral\_26" 662 "lh.precentral\_25"  
650 "lh.precentral\_26" 681 "lh.paracentral\_10"  
651 "lh.precentral\_21" 666 "lh.precentral\_11"  
651 "lh.precentral\_21" 668 "lh.precentral\_8"  
651 "lh.precentral\_21" 669 "lh.precentral\_15"  
651 "lh.precentral\_21" 720 "lh.postcentral\_18"  
651 "lh.precentral\_21" 768 "lh.superiorparietal\_20"  
651 "lh.precentral\_21" 769 "lh.superiorparietal\_27"  
651 "lh.precentral\_21" 770 "lh.superiorparietal\_25"  
651 "lh.precentral\_21" 820 "lh.precuneus\_10"  
652 "lh.precentral\_10" 1008 "Left-Thalamus-Proper"  
654 "lh.precentral\_16" 770 "lh.superiorparietal\_25"  
654 "lh.precentral\_16" 771 "lh.superiorparietal\_13"  
657 "lh.precentral\_4" 769 "lh.superiorparietal\_27"  
657 "lh.precentral\_4" 770 "lh.superiorparietal\_25"  
664 "lh.precentral\_20" 1010 "Left-Putamen"  
665 "lh.precentral\_29" 1008 "Left-Thalamus-Proper"  
669 "lh.precentral\_15" 699 "lh.posteriorcingulate\_4"  
669 "lh.precentral\_15" 758 "lh.supramarginal\_15"  
669 "lh.precentral\_15" 770 "lh.superiorparietal\_25"  
669 "lh.precentral\_15" 1013 "Left-Hippocampus"  
675 "lh.precentral\_28" 757 "lh.supramarginal\_16"  
676 "lh.precentral\_23" 756 "lh.supramarginal\_4"  
676 "lh.precentral\_23" 758 "lh.supramarginal\_15"  
687 "lh.paracentral\_11" 757 "lh.supramarginal\_16"  
691 "lh.rostralanteriorcingulate\_2" 698 "lh.posteriorcingulate\_5"  
691 "lh.rostralanteriorcingulate\_2" 1005 "lh.insula\_7"  
692 "lh.rostralanteriorcingulate\_5" 1005 "lh.insula\_7"  
697 "lh.caudalanteriorcingulate\_3" 705 "lh.posteriorcingulate\_7"  
697 "lh.caudalanteriorcingulate\_3" 706 "lh.posteriorcingulate\_1"  
697 "lh.caudalanteriorcingulate\_3" 709 "lh.isthmuscingulate\_7"  
703 "lh.posteriorcingulate\_6" 755 "lh.supramarginal\_17"  
706 "lh.posteriorcingulate\_1" 1013 "Left-Hippocampus"  
707 "lh.isthmuscingulate\_4" 712 "lh.isthmuscingulate\_2"

4 LIST L-II: THE EXCESS EDGES WITH LARGE WEIGHTS IN THE F-CONNECTOME

707 "lh.isthmuscingulate\_4" 769 "lh.superiorparietal\_27"  
708 "lh.isthmuscingulate\_6" 713 "lh.isthmuscingulate\_3"  
708 "lh.isthmuscingulate\_6" 769 "lh.superiorparietal\_27"  
708 "lh.isthmuscingulate\_6" 770 "lh.superiorparietal\_25"  
709 "lh.isthmuscingulate\_7" 768 "lh.superiorparietal\_20"  
709 "lh.isthmuscingulate\_7" 776 "lh.superiorparietal\_19"  
709 "lh.isthmuscingulate\_7" 836 "lh.precuneus\_9"  
710 "lh.isthmuscingulate\_1" 770 "lh.superiorparietal\_25"  
711 "lh.isthmuscingulate\_5" 1009 "Left-Caudate"  
712 "lh.isthmuscingulate\_2" 1009 "Left-Caudate"  
718 "lh.postcentral\_14" 1008 "Left-Thalamus-Proper"  
720 "lh.postcentral\_18" 991 "lh.insula\_5"  
720 "lh.postcentral\_18" 1008 "Left-Thalamus-Proper"  
720 "lh.postcentral\_18" 1009 "Left-Caudate"  
726 "lh.postcentral\_30" 992 "lh.insula\_2"  
726 "lh.postcentral\_30" 1008 "Left-Thalamus-Proper"  
730 "lh.postcentral\_8" 991 "lh.insula\_5"  
730 "lh.postcentral\_8" 1008 "Left-Thalamus-Proper"  
731 "lh.postcentral\_31" 758 "lh.supramarginal\_15"  
731 "lh.postcentral\_31" 770 "lh.superiorparietal\_25"  
738 "lh.postcentral\_10" 1008 "Left-Thalamus-Proper"  
738 "lh.postcentral\_10" 1009 "Left-Caudate"  
738 "lh.postcentral\_10" 1011 "Left-Pallidum"  
742 "lh.postcentral\_19" 755 "lh.supramarginal\_17"  
746 "lh.supramarginal\_7" 1008 "Left-Thalamus-Proper"  
747 "lh.supramarginal\_5" 1008 "Left-Thalamus-Proper"  
749 "lh.supramarginal\_13" 1009 "Left-Caudate"  
750 "lh.supramarginal\_2" 768 "lh.superiorparietal\_20"  
750 "lh.supramarginal\_2" 774 "lh.superiorparietal\_15"  
750 "lh.supramarginal\_2" 779 "lh.superiorparietal\_16"  
750 "lh.supramarginal\_2" 1003 "lh.insula\_15"  
750 "lh.supramarginal\_2" 1004 "lh.insula\_4"  
751 "lh.supramarginal\_3" 1009 "Left-Caudate"  
755 "lh.supramarginal\_17" 1011 "Left-Pallidum"  
756 "lh.supramarginal\_4" 1008 "Left-Thalamus-Proper"  
757 "lh.supramarginal\_16" 997 "lh.insula\_14"  
757 "lh.supramarginal\_16" 1011 "Left-Pallidum"  
758 "lh.supramarginal\_15" 1010 "Left-Putamen"  
767 "lh.superiorparietal\_24" 1011 "Left-Pallidum"  
768 "lh.superiorparietal\_20" 1008 "Left-Thalamus-Proper"  
768 "lh.superiorparietal\_20" 1009 "Left-Caudate"  
769 "lh.superiorparietal\_27" 832 "lh.precuneus\_6"  
769 "lh.superiorparietal\_27" 1011 "Left-Pallidum"  
770 "lh.superiorparietal\_25" 776 "lh.superiorparietal\_19"  
770 "lh.superiorparietal\_25" 796 "lh.inferiorparietal\_16"  
770 "lh.superiorparietal\_25" 993 "lh.insula\_16"  
770 "lh.superiorparietal\_25" 1011 "Left-Pallidum"  
771 "lh.superiorparietal\_13" 831 "lh.precuneus\_22"  
771 "lh.superiorparietal\_13" 965 "lh.superiortemporal\_24"  
771 "lh.superiorparietal\_13" 1008 "Left-Thalamus-Proper"  
775 "lh.superiorparietal\_12" 821 "lh.precuneus\_8"  
775 "lh.superiorparietal\_12" 822 "lh.precuneus\_3"  
779 "lh.superiorparietal\_16" 965 "lh.superiortemporal\_24"  
779 "lh.superiorparietal\_16" 1010 "Left-Putamen"  
780 "lh.superiorparietal\_11" 965 "lh.superiortemporal\_24"  
780 "lh.superiorparietal\_11" 1010 "Left-Putamen"

4 LIST L-II: THE EXCESS EDGES WITH LARGE WEIGHTS IN THE F-CONNECTOME

781 "lh.superiorparietal\_18" 820 "lh.precuneus\_10"  
784 "lh.superiorparietal\_4" 832 "lh.precuneus\_6"  
785 "lh.superiorparietal\_6" 1010 "Left-Putamen"  
786 "lh.superiorparietal\_2" 808 "lh.inferiorparietal\_21"  
786 "lh.superiorparietal\_2" 892 "lh.lingual\_7"  
786 "lh.superiorparietal\_2" 965 "lh.superiortemporal\_24"  
786 "lh.superiorparietal\_2" 993 "lh.insula\_16"  
786 "lh.superiorparietal\_2" 1010 "Left-Putamen"  
790 "lh.superiorparietal\_9" 849 "lh.pericalcarine\_2"  
794 "lh.superiorparietal\_29" 849 "lh.pericalcarine\_2"  
796 "lh.inferiorparietal\_16" 851 "lh.pericalcarine\_3"  
796 "lh.inferiorparietal\_16" 869 "lh.lateraloccipital\_21"  
796 "lh.inferiorparietal\_16" 870 "lh.lateraloccipital\_23"  
796 "lh.inferiorparietal\_16" 871 "lh.lateraloccipital\_5"  
796 "lh.inferiorparietal\_16" 875 "lh.lateraloccipital\_8"  
796 "lh.inferiorparietal\_16" 893 "lh.fusiform\_12"  
796 "lh.inferiorparietal\_16" 894 "lh.fusiform\_7"  
796 "lh.inferiorparietal\_16" 1010 "Left-Putamen"  
801 "lh.inferiorparietal\_15" 807 "lh.inferiorparietal\_17"  
801 "lh.inferiorparietal\_15" 888 "lh.lingual\_2"  
801 "lh.inferiorparietal\_15" 993 "lh.insula\_16"  
801 "lh.inferiorparietal\_15" 1010 "Left-Putamen"  
801 "lh.inferiorparietal\_15" 1013 "Left-Hippocampus"  
805 "lh.inferiorparietal\_2" 814 "lh.inferiorparietal\_14"  
805 "lh.inferiorparietal\_2" 993 "lh.insula\_16"  
805 "lh.inferiorparietal\_2" 1010 "Left-Putamen"  
806 "lh.inferiorparietal\_18" 815 "lh.inferiorparietal\_1"  
806 "lh.inferiorparietal\_18" 889 "lh.lingual\_15"  
806 "lh.inferiorparietal\_18" 994 "lh.insula\_12"  
807 "lh.inferiorparietal\_17" 888 "lh.lingual\_2"  
807 "lh.inferiorparietal\_17" 895 "lh.fusiform\_17"  
807 "lh.inferiorparietal\_17" 994 "lh.insula\_12"  
808 "lh.inferiorparietal\_21" 815 "lh.inferiorparietal\_1"  
808 "lh.inferiorparietal\_21" 989 "lh.transversetemporal\_3"  
808 "lh.inferiorparietal\_21" 990 "lh.transversetemporal\_2"  
808 "lh.inferiorparietal\_21" 993 "lh.insula\_16"  
808 "lh.inferiorparietal\_21" 1008 "Left-Thalamus-Proper"  
808 "lh.inferiorparietal\_21" 1010 "Left-Putamen"  
809 "lh.inferiorparietal\_12" 815 "lh.inferiorparietal\_1"  
809 "lh.inferiorparietal\_12" 993 "lh.insula\_16"  
809 "lh.inferiorparietal\_12" 1010 "Left-Putamen"  
815 "lh.inferiorparietal\_1" 965 "lh.superiortemporal\_24"  
815 "lh.inferiorparietal\_1" 1010 "Left-Putamen"  
816 "lh.inferiorparietal\_20" 833 "lh.precuneus\_11"  
816 "lh.inferiorparietal\_20" 838 "lh.precuneus\_18"  
816 "lh.inferiorparietal\_20" 852 "lh.pericalcarine\_6"  
816 "lh.inferiorparietal\_20" 888 "lh.lingual\_2"  
816 "lh.inferiorparietal\_20" 892 "lh.lingual\_7"  
816 "lh.inferiorparietal\_20" 993 "lh.insula\_16"  
816 "lh.inferiorparietal\_20" 1008 "Left-Thalamus-Proper"  
816 "lh.inferiorparietal\_20" 1010 "Left-Putamen"  
837 "lh.precuneus\_15" 869 "lh.lateraloccipital\_21"  
848 "lh.pericalcarine\_4" 862 "lh.lateraloccipital\_12"  
849 "lh.pericalcarine\_2" 855 "lh.lateraloccipital\_10"  
850 "lh.pericalcarine\_5" 863 "lh.lateraloccipital\_14"  
852 "lh.pericalcarine\_6" 858 "lh.lateraloccipital\_4"



869 "lh.lateraloccipital\_21" 875 "lh.lateraloccipital\_8"  
 870 "lh.lateraloccipital\_23" 889 "lh.lingual\_15"  
 870 "lh.lateraloccipital\_23" 915 "lh.parahippocampal\_5"  
 872 "lh.lateraloccipital\_17" 884 "lh.lingual\_6"  
 888 "lh.lingual\_2" 959 "lh.bankssts\_4"  
 892 "lh.lingual\_7" 965 "lh.superiortemporal\_24"  
 894 "lh.fusiform\_7" 959 "lh.bankssts\_4"  
 901 "lh.fusiform\_11" 958 "lh.bankssts\_6"  
 903 "lh.fusiform\_16" 945 "lh.middletemporal\_13"  
 904 "lh.fusiform\_2" 957 "lh.bankssts\_2"  
 906 "lh.fusiform\_8" 958 "lh.bankssts\_6"  
 909 "lh.fusiform\_13" 957 "lh.bankssts\_2"  
 914 "lh.parahippocampal\_4" 959 "lh.bankssts\_4"  
 915 "lh.parahippocampal\_5" 938 "lh.inferiortemporal\_7"  
 915 "lh.parahippocampal\_5" 959 "lh.bankssts\_4"  
 923 "lh.inferiortemporal\_15" 957 "lh.bankssts\_2"  
 923 "lh.inferiortemporal\_15" 959 "lh.bankssts\_4"  
 927 "lh.inferiortemporal\_5" 958 "lh.bankssts\_6"  
 928 "lh.inferiortemporal\_8" 958 "lh.bankssts\_6"  
 934 "lh.inferiortemporal\_3" 939 "lh.middletemporal\_6"  
 952 "lh.middletemporal\_2" 957 "lh.bankssts\_2"  
 953 "lh.middletemporal\_4" 1013 "Left-Hippocampus"  
 957 "lh.bankssts\_2" 994 "lh.insula\_12"  
 958 "lh.bankssts\_6" 1013 "Left-Hippocampus"  
 959 "lh.bankssts\_4" 989 "lh.transversetemporal\_3"  
 959 "lh.bankssts\_4" 1010 "Left-Putamen"  
 970 "lh.superiortemporal\_25" 989 "lh.transversetemporal\_3"  
 981 "lh.superiortemporal\_10" 1013 "Left-Hippocampus"  
 1007 "lh.insula\_17" 1013 "Left-Hippocampus"

---

**5. FIG. SI-3: THE COMPLETE SUBGRAPH  
F-EXCESS1195**

4 LIST L-II: THE EXCESS EDGES WITH LARGE WEIGHTS IN THE F-CONNECTOME

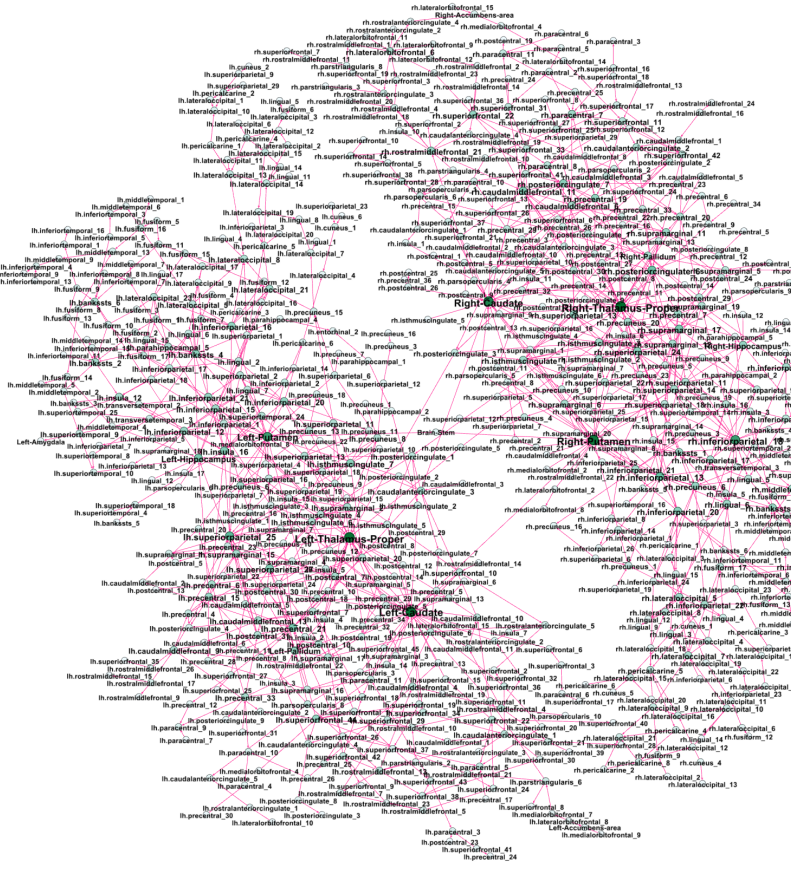

FIG. SI-3: The structure of the subgraph F-excess1195 consisting of the 1195 excess edges in the F-connectome.
